1  
2  
3  
4  
5  
6  
7  
8  
9  
10  
11  
12  
13  
14  
15  
16  
17  
18  
19

Prenatal heat stress effects on gestation and postnatal behavior in kid goats

Wellington Coloma-García<sup>1,2</sup>, Nabil Mehaba<sup>1</sup>, Pol Llonch<sup>3</sup>, Gerardo Caja<sup>1</sup>, Xavier Such<sup>1\*</sup>,  
and Ahmed A. K. Salama<sup>1</sup>

<sup>1</sup> Group of Research in Ruminants (G2R), Department of Animal and Food Science,  
Universitat Autònoma de Barcelona (UAB), Bellaterra, Barcelona, Spain

<sup>2</sup> Facultad de Medicina Veterinaria, Universidad Agraria del Ecuador (UAE), Guayaquil,  
Ecuador

<sup>3</sup> Service of Nutrition and Animal Welfare (SNiBA), Department of Animal and Food  
Science, Universitat Autònoma de Barcelona (UAB), Bellaterra, Barcelona, Spain

\* Corresponding author

E-mail: [xavier.such@uab.cat](mailto:xavier.such@uab.cat) (XS)

20 **Abstract**

21 Consequences of heat stress during pregnancy can affect the normal development of the  
22 offspring. In the present experiment, 30 Murciano-Granadina dairy goats ( $41.8 \pm 5.7$  kg) were  
23 exposed to 2 thermal environments varying in temperature-humidity index (THI) from 12  
24 days before mating to 45 days of gestation. The environmental conditions were: gestation  
25 thermal-neutral (GTN;  $\text{THI} = 71 \pm 3$ ); and gestation heat stress (GHS;  $\text{THI} = 85 \pm 3$ ). At  $27 \pm$   
26 4 days old, GTN-born female kids ( $n = 16$ ) and GHS-born ones ( $n = 10$ ) were subjected to 2  
27 tests: arena test (AT) and novel object test (NOT), the latter was repeated at 3 months of age.  
28 Additionally, 8 months after birth, a subset of growing goats ( $n = 8$ ) coming from GTN and  
29 GHS ( $16.8 \pm 3.4$  kg BW) were exposed consecutively to 2 environmental conditions: a basal  
30 thermal-neutral period ( $\text{THI} = 72 \pm 3$ ) for 7 days, and a heat-stress period ( $\text{THI} = 87 \pm 2$ ) for  
31 21 days. In both periods, feeding behavior, resting behavior, other active behaviors  
32 (exploring, grooming), thermally-associated behaviors and posture were recorded. The  
33 gestation length was shortened by 3 days in GHS goats. In the AT, GHS kids showed a lower  
34 number of sniffs ( $P < 0.01$ ) compared to GTN. In the NOT, GHS kids also tended to show a  
35 lower number of sniffs ( $P = 0.09$ ). During heat exposure, GTN and GHS growing goats spent  
36 more time resting as well as exhibited more heat-stress related behaviors such as panting and  
37 drinking ( $P < 0.001$ ); however, no differences were observed between both groups. In  
38 conclusion, heat stress during the first third of pregnancy shortened gestation length and  
39 influenced the exploratory behavior of the kids in the early life without impact on the  
40 behavior during the adulthood when exposed to heat stress.

41

42 Key words: fetal programming, heat stress, goats

## 43 **Introduction**

44 There is evidence that environmental conditions during pregnancy can modify fetal  
45 programming through physiological and epigenetic changes [1, 2], which permanently modify  
46 the behavior, health and productivity of the offspring. Several studies have shown that  
47 episodes of stress during the prenatal stage have negative effects on the pregnancy itself, by  
48 shortening its duration [3, 4], and on the postnatal life of the offspring by reducing birth  
49 weight [2].

50 Beyond these effects, maternal stress during pregnancy has shown to have profound  
51 effects on the development and function of the hypothalamic-pituitary-adrenal (HPA) axis,  
52 and the associated circulating ACTH and cortisol concentrations [5]. Moreover, recent  
53 research suggests that these effects remain in further generations [6]. In this regard, most  
54 studies using rodent or primate models, have evidenced the negative impact of gestational  
55 stress on increased aggressiveness and altered social interactions [7-9] and a reduction in the  
56 neuromotor capacities and exploration and learning [4,10].

57 In the future, as global warming progresses, an increase in temperatures accompanied  
58 by increasingly frequent heat waves is expected [11]. In the case of ruminants, heat stress  
59 during pregnancy has attracted special attention, due to the significant impact on food  
60 production (i.e. milk) [12]. Furthermore, although literature is scarce, thermal stress during  
61 pregnancy is demonstrated to be responsible for the abnormal development of the fetus and  
62 cause a harmful effect in the early postpartum period and adulthood. For instance, prenatal  
63 heat stress can impair the normal postnatal growth of the offspring and compromise their  
64 passive immunity but also alter the behavioral patterns [13,14]. Nevertheless, the previous  
65 studies evaluated the impact of maternal heat stress during the late gestation in cows, but little  
66 is known about the effects of heat stress during early pregnancy on offspring behavior in dairy  
67 animals, including cows and goats. There is strong evidence that fetal programming occurs

68 during early gestation in ruminants, and several environmental and nutritional factors during  
69 this period can condition performance of offspring permanently. For instance, adequate  
70 maternal nutrition in early gestation is critical for the normal development of all fetal organs  
71 and tissues [15]. Additionally, exposure of cows to limited nutrition during early gestation  
72 resulted in decreased skeletal muscle mass and altered glucose metabolism of offspring [16].  
73 Therefore, we hypothesized that heat stress (with its related effects such as altered blood flow,  
74 changes in hormone levels, reduced feed intake, etc.) during early gestation would alter  
75 performance and response of offspring to environmental stimuli.

76 Behavior is a phenotypical trait that is very sensitive to the environment. One of the  
77 first changes that can be observed in animals that are under stressful conditions is a change in  
78 their behavior repertoire. Within behavior, the way animals react to novel situations is also  
79 influenced by the environmental conditions in where they live [17]. Therefore, behavior is a  
80 sensitive measure to investigate changes of perception of the environment. In the present  
81 study, it was investigated the effect of heat stress in goats at the beginning of the pregnancy  
82 on the gestation performance and the changes in the behavior of the offspring when  
83 challenged with heat, both at neonatal and adult stages.

84

## 85 **Materials and methods**

86 The animal care conditions, treatment, housing, and management practices followed the  
87 procedures stated by the Ethical Committee of Animals and Humans Experimentation of the  
88 UAB (4790) and following the EU legislation (Regulation 2010/63/EC).

89

## 90 **Treatments and management conditions of dams**

91 Thirty multiparous lactating Murciano-Granadina dairy goats of  $41.8 \pm 5.7$  kg body weight  
92 (BW) bred at the experimental farm of UAB were used. Goats were housed in 6 pens ( $5 \times 2.5$

93 m<sup>2</sup>) of 5 goats each, distributed equally in 2 adjacent rooms, one for each treatment. Goats  
94 were distributed by similar BW within each pen. The present experiment was carried out  
95 during spring (March to June). After 2 weeks of adaptation to the experimental conditions,  
96 goats were distributed in 2 groups exposed to 2 different climatic conditions (n = 15) from  
97 day 12 before mating until day 45 of gestation. The climatic conditions were: thermo-neutral  
98 (TN), and heat stress conditions (HS). The TN group was maintained between 15 and 20°C  
99 (room temperature), and 49 ± 8% relative humidity (temperature humidity index, THI = 71 ±  
100 3, calculated according to NRC [18]), and HS group for 12-h day at 37 ± 0.5°C and 45 ± 5%  
101 relative humidity (THI = 85 ± 3) and 12-h night at 30 ± 0.5°C and 47 ± 2% relative humidity  
102 (THI = 80 ± 2). The room housing HS animals was equipped with 4 electric heaters coupled  
103 to thermostat (3.5 kW; General Electric, Barcelona, Spain). Environmental temperature and  
104 humidity were recorded every 10 min throughout the experiment by data loggers (Opus 10,  
105 Lufft, Fellbach, Germany). Both treatments were maintained from 12 days before mating until  
106 45 days after mating (early gestation).

107 Estrus was synchronized in 2-day intervals. Synchronization was performed using  
108 intravaginal sponges (progesterone P4; Sincropart 30 mg, Ceva Animal Health, Barcelona,  
109 Spain) for 12 days followed by the administration of equine-chorionic gonadotropin (eCG,  
110 400 IU; Ceva Animal Health) at the time of sponge withdrawal. Goats were naturally mated  
111 by the same buck at 2-day intervals.

112 Feed was provided *ad libitum* as a total mixed ration (70% alfalfa hay and 30%  
113 concentrate). Concentrate contained barley 31.5%, corn 41.5%, soybean meal 44.5%, sodium  
114 bicarbonate 1%, calcium phosphate 0.4%, calcium carbonate 0.5%, salt 0.7%, and premix  
115 0.4%; as fed basis. Water was freely available at room temperature. Mineral salt blocks (Na  
116 36.7%, Ca 0.32%, Mg 1.09%, Zn 5 g/kg, Mn 1.5g /kg, S 912 mg/kg, Fe 304 mg/kg, I 75

117 mg/kg, Co 50 mg/kg, and Se 25 mg/kg; Ovi Bloc, Sal Cupido, Terrassa, Spain) were freely  
118 available in each pen throughout the experiment.

119 Goats were milked twice per day using a mobile milking unit set at 42 kPa, 90  
120 pulses/min, and 66% pulsation ratio. Feed intake was recorded daily, calculated by the  
121 difference between the weight of the ration offered and the leftover at the end of the day.  
122 Rectal temperature (RT) and respiration rate (RR) were recorded daily 3 times per day at 8,  
123 12, and 17 h. RT was recorded with a digital veterinary thermometer (ST714AC Accu-vet,  
124 Tecnovet S.L, Barcelona, Spain). RR was calculated as the number of breaths per minute by  
125 counting the flank movements with the help of a chronograph and from a distance of 2 m  
126 without disturbing the goats.

127 Pregnancy was confirmed by trans-rectal ultrasound at day 21 and 45 after mating, and  
128 all goats were confirmed to be pregnant. After 45 days of gestation, all goats were gathered in  
129 one group and managed under semi-intensive conditions (grazing 6 h/day and feed  
130 complemented when indoors). Two weeks before the expected date of parturition, the goats  
131 were weighed and moved to kidding pens for permanent surveillance and parturition  
132 assistance. Immediately after birth, kids were separated from the goats and fed with their  
133 mothers' colostrum and reared together with milk replacer (150 g/L, Elvor, Saint-Brice,  
134 France) with an automatic milk provider (Foerster-technik, Engen, Germany). Pregnancy  
135 length and litter size of kids were recorded after parturition. BW of kids was recorded at birth  
136 and every week until 4 weeks old with a digital scale (Tru-Test AG500 Digital Indicator,  
137 accuracy, Auckland, New Zealand).

138

### 139 **Behavioral tests and measurements with kids**

140 For the behavioral assessment, female kids at  $27 \pm 4$  days old, from gestation TN (GTN; n =  
141 16) or gestation HS (GHS; n = 10) conditions were individually exposed to an arena test (AT)

142 for 5 consecutive days, and to a novel object test (NOT) at 48 h after the end of the AT. The  
143 NOT test was repeated at 3 months of age. Behavioral tests were carried out into an artificial  
144 climatic chamber (Euroshield, ETS Lindgren-Euroshield Oy, Eura, Finland) in order to avoid  
145 sounds from outside and variations of temperature. All tests were video recorded for  
146 subsequent analysis.

147

#### 148 **Arena test (AT)**

149 The AT was carried out in a  $4 \times 4 \times 2.3$  m<sup>3</sup> arena ( $w \times l \times h$ ), in which 9 squares of  $1.3 \times 1.3$   
150 m<sup>2</sup> were painted on the ground with chalk. The access to the arena was through a starting cage  
151 of  $50 \times 50 \times 60$  cm<sup>3</sup> ( $w \times l \times h$ ) separated from the arena by a guillotine door (Fig A in S1).  
152 On the test day, each kid was randomly selected among the 2 treatments, transported from the  
153 nursery to the starting cage and freed 30 s later into the arena. The duration of the test was 8  
154 min and time started to run when the kid was completely inside the arena. The following  
155 behavioral parameters were measured: number of squares entered, frequency of jumping and  
156 sniffing (nose less than 5 cm from the walls or floor) events, number of vocalizations and  
157 distance walked (movement forward).

158

#### 159 **Novel object test (NOT)**

160 With NOT the same procedure was followed as for AT and the same behavioral  
161 measurements were registered. In addition, a road hazard cone ( $0.5 \times 0.7$  m<sup>2</sup>,  $w \times h$ ) was  
162 placed on the floor against the wall opposite to the starting cage (Fig B in S1), thereby the  
163 latency and the frequency of sniffing events addressed to the novel object were registered.  
164 The NOT test was repeated one month later.

165

## 166 **Heat-stress challenge trial with growing goats**

167 To compare the behavioral response of animals born from GTN and GHS goats to the same  
168 stressor (i.e., heat stress) after sexual maturity, a subset of the growing goats was selected at 8  
169 months of age. The animals were balanced by BW and mother parity, and randomly allocated  
170 to individual pens (1.08 m<sup>2</sup>) with 8 replicates per group. After one week for adaptation to  
171 facilities, 2 different climatic conditions were applied in 2 consecutive periods to both groups,  
172 following a randomized controlled design. During the first period, basal period (1 week),  
173 temperature and humidity were in average  $24 \pm 2.43^{\circ}\text{C}$  and  $68 \pm 9\%$  (THI = 72), respectively.  
174 On the other hand, during the heat-stress challenge period (3 weeks), the average temperature  
175 was  $37 \pm 1.8^{\circ}\text{C}$  and humidity was  $49 \pm 7.0\%$  (THI = 87) during the day and  $31 \pm 1.4^{\circ}\text{C}$  and  $53$   
176  $\pm 7.0\%$  (THI = 80), respectively, at night. Room temperature was automatically controlled  
177 with a thermostat (3.5 kW; General Electric, Barcelona, Spain) regulating 4 electric heaters.  
178 Environmental temperature and humidity were continuously recorded every 10 min  
179 throughout the experiment by data loggers (Opus 10, Lufft, Fellbach, Germany).

180 Feed was provided as a total mixed ration consisting of 85% alfalfa hay and 15%  
181 concentrate (as feed basis: oat grain 5%, malting barley 10%, canola meal 10%, gluten feed  
182 10%, corn 4.7 %, soy hulls 45%, soybean oil 5%, soybean meal 5%, molasses 2%, bicalcic  
183 phosphate 2.5%, salt 0.5%, premix 0.3%) once daily at 9:30 h. Clean water was freely and  
184 individually available for each goat.

185

## 186 **Behavior measurements of growing goats**

187 A single trained observer recorded behavior following a scan-sampling methodology [19].  
188 Behaviors were recorded between 12 h and 17 h, within the period of heat stress. The  
189 behavioral observations were performed daily and the duration of each session was 2 h,  
190 whereby each pen was scanned 40 times at 3 min interval.



191 The behavioral measurements were drawn from the Welfare Assessment Protocol for  
192 Goats [20]. Feeding (feeding + rumination + drinking), other non-feeding active and inactive  
193 behaviors (exploration + grooming + other + resting) and physiological behavior associated to  
194 thermal stress (open-mouth or close-mouth panting) were recorded as well as posture  
195 (standing-walking + standing-immobile + lying-straight + lying-joint). The definition of the  
196 recorded behaviors is presented in Table S1.

197

### 198 **Statistical analyses**

199 The duration of pregnancy and birth weight were analyzed with the GLM procedure of SAS  
200 (version 9.4; SAS Institute Inc., Cary, NC). The feed intake and RT and RR measurements of  
201 the goats (dams) were analyzed as repeated measures using a linear mixed model (PROC  
202 MIXED procedure). Behavioral data from NAT and scan sampling during the heat exposure  
203 trial, as counts and week average percentages, respectively, were analyzed as repeated  
204 measures using a generalized linear mixed occasional behaviors, using a generalized linear  
205 model (PROC GENMOD), all adjusted under a Poisson or a Negative Binomial distribution,  
206 according to the fitness of the model. Also, litter size was analyzed using the PROC  
207 GENMOD procedure. The models included treatment (GHS vs GTN) as fixed effect, and in  
208 the case of repeated measures, day or week was also included as a fixed effect as well as the  
209 interaction of treatment  $\times$  day or treatment  $\times$  week, while animal was considered as a random  
210 effect. Litter size was also used as a covariable for the analysis of the duration of pregnancy  
211 and litter weight. Differences between least squares means were determined with the PDIFF  
212 test of SAS. Significance was declared at  $P < 0.05$  and trend at  $P < 0.10$  unless otherwise  
213 indicated.

214

215 **Results**

216 **Effects of heat stress during the pregnancy and early postpartum**

217 Regarding the physiology measurements of goats during the experimental period, GHS goats  
 218 showed a higher RT compared to GTN goats (average 38.7°C for GTN and 39.3°C for GHS;  
 219 SED = 0.07 and  $P < 0.01$ ) and higher RR (average 33 breaths/min for GTN and 108  
 220 breaths/min for GHS; SED = 3.06 and  $P < 0.01$ ), indicating that GHS treatment effectively  
 221 triggered a heat stress response. Feed intake was lower in GHS compared to GTN goats (2.52  
 222 kg/day for GTN and 2.12 kg/day for GHS; SED = 0.55 and  $P = 0.001$ ).

223 The results of the different variables evaluated at parturition and early postpartum  
 224 period are shown in Table 1. The gestation length was on average shortened 3 days in GHS  
 225 goats compared to GTN ( $P = 0.006$ ). The litter weight of GHS group tended to be lower  
 226 compared to GTN ( $P = 0.061$ ). Litter weight showed to be influenced by the litter size ( $P <$   
 227  $0.001$ ), as a greater litter size was associated to smaller kids. However, litter size and kids  
 228 weight at 35 days of age were not affected by the treatment ( $P > 0.10$ ).

229 **Table 1. Gestation length in dams and performance of kids at birth and early**  
 230 **postpartum period.**

| Item                                         | Treatment <sup>1</sup> |      | SED <sup>2</sup> | Effect ( $P$ -value) |                          |
|----------------------------------------------|------------------------|------|------------------|----------------------|--------------------------|
|                                              | GTN                    | GHS  |                  | Treatment            | Litter size <sup>3</sup> |
| Litter size                                  | 2.31                   | 2.23 | 0.31             | 0.806                | -                        |
| Litter weight, kg                            | 5.40                   | 4.71 | 0.71             | 0.061                | 0.001                    |
| Duration of pregnancy, day                   | 146                    | 143  | 0.9              | 0.006                | 0.915                    |
| Birth-weight of kids <sup>4</sup> , kg       | 2.34                   | 2.18 | 0.10             | 0.122                | -                        |
| Weight of 35-days-old kids <sup>5</sup> , kg | 7.88                   | 7.64 | 0.54             | 0.520                | -                        |

231 <sup>1</sup> GTN, dams exposed to thermal-neutral conditions during the first 45 days of gestation (n =  
 232 15); GHS, dams exposed to heat-stress during the first 45 days of gestation (n = 15).

233 <sup>2</sup> Standard error of the difference.

234 <sup>3</sup> Litter size used as a covariable.

235 <sup>4</sup> n = 30 kids for GTN, and n = 30 for GHS.

236 <sup>5</sup> n = 26 kids for GTN, and n = 23 for GHS.

237

### 238 Behavioral tests on kids

239 The results of the behavioral tests are summarized in Table 2. In the arena test (AT), a  
 240 significant day effect was observed in all parameters, as the number of vocalizations ( $P <$   
 241  $0.001$ ) and walked distance ( $P = 0.001$ ) decreased, whereas the number of jumping ( $P <$   
 242  $0.001$ ) and sniffing events ( $P = 0.009$ ) increased from day 1 to day 5, reflecting habituation of  
 243 kids to the arena test facilities. Also, the number of squares that kids walked through showed  
 244 to be higher from day 1 to day 2 afterwards being diminished towards day 5 ( $P \leq 0.001$ ),  
 245 which is consistent with the reduction in the walked distance. Regarding the effect of  
 246 treatment, GHS kids showed a lower number of sniffing events compared to GTN kids ( $P =$   
 247  $0.009$ ). Additionally, the significant interaction between treatment and day for vocalizations  
 248 ( $P < 0.001$ ) was due to the fact that the number of vocalizations in the GHS kids was lower  
 249 during the 2 first days ( $P \leq 0.05$ ) and recovered thereafter. The rest of behavioral parameters  
 250 assessed were not influenced by the gestational exposure to heat stress ( $P > 0.10$ ).

251 **Table 2. Behavioral responses in arena test (AT) of female kids during 5 consecutive**  
 252 **days.**

| Item                       | Treatment <sup>1</sup> |      | SED <sup>2</sup> | Effect ( $P$ -value) |       |         |
|----------------------------|------------------------|------|------------------|----------------------|-------|---------|
|                            | GTN                    | GHS  |                  | Trt <sup>3</sup>     | Day   | Trt×Day |
| No. of squares entered     | 43.4                   | 31.5 | 4.87             | 0.115                | 0.009 | 0.704   |
| No. of jumps               | 1.54                   | 1.15 | 0.476            | 0.586                | 0.001 | 0.546   |
| No. of sniffs of the arena | 33.5                   | 26.7 | 1.62             | 0.007                | 0.001 | 0.335   |

|                             |      |      |      |       |       |       |
|-----------------------------|------|------|------|-------|-------|-------|
| <b>No. of vocalizations</b> | 171  | 150  | 11.7 | 0.200 | 0.001 | 0.001 |
| <b>Distance travel (s)</b>  | 54.8 | 44.9 | 7.06 | 0.282 | 0.001 | 0.123 |

253 <sup>1</sup> GTN, kids born to dams exposed to thermal-neutral conditions during the first 45 days of  
 254 gestation (n = 16); GHS, kids born to dams exposed to heat stress conditions during the first  
 255 45 days of gestation (n = 10).

256 <sup>2</sup> Standard error of the difference.

257 <sup>3</sup> Trt, treatment effect (GHS vs GTN).

258

259 Regarding the novel object test (NOT) results (Table 3), this test was performed at 1  
 260 and 3 months of age. At 1 month of age, GHS kids showed a trend to reduce the number of  
 261 sniffing events compared to GTN kids ( $P = 0.093$ ) revealing a smaller motivation for  
 262 exploration of novel objects in kids whose mothers suffered from heat stress during gestation.  
 263 No treatment differences were detected in the rest of the behavioral parameters measured. At  
 264 3 months of age, no treatment effects were found on any of the parameters assessed in the  
 265 NOT.

266 **Table 3. Behavioral responses in novel arena test (NOT) of female kids at 1 and 3**  
 267 **months of age.** Values are presented as means  $\pm$  standard deviation.

| <b>Item</b>                | <b>Treatment<sup>1</sup></b> |                  | <b>Effect (<i>P</i>-value)</b> |
|----------------------------|------------------------------|------------------|--------------------------------|
|                            | <b>GTN</b>                   | <b>GHS</b>       | <b>Treatment</b>               |
| <b>1 month of age</b>      |                              |                  |                                |
| No. of squares entered     | 47.5 $\pm$ 1.08              | 38.9 $\pm$ 1.10  | 0.127                          |
| No. of jumps               | 4.81 $\pm$ 1.700             | 2.30 $\pm$ 1.980 | 0.413                          |
| No. of sniffs of the arena | 36.1 $\pm$ 1.06              | 30.3 $\pm$ 1.08  | 0.093                          |
| No. of vocalizations       | 156 $\pm$ 1.1                | 162 $\pm$ 1.1    | 0.670                          |
| Distance travel (s)        | 48.8 $\pm$ 3.87              | 41.0 $\pm$ 4.90  | 0.220                          |

|                                            |              |              |       |
|--------------------------------------------|--------------|--------------|-------|
| No. of sniffs of the object                | 14.8 ± 1.14  | 10.5 ± 1.19  | 0.136 |
| Latency before 1st sniff of the object (s) | 53.9 ± 53.80 | 77.4 ± 24.80 | 0.562 |
| <b>3 months of age</b>                     |              |              |       |
| No. of squares entered                     | 41.3 ± 1.10  | 41.3 ± 1.13  | 0.998 |
| No. of jumps                               | 0.31 ± 1.560 | 0.50 ± 1.560 | 0.461 |
| No. of sniffs of the arena                 | 30.1 ± 1.06  | 33.5 ± 1.08  | 0.286 |
| No. of vocalizations                       | 168 ± 1.0    | 157 ± 1.0    | 0.670 |
| Distance travel (s)                        | 59.0 ± 6.46  | 53.0 ± 8.17  | 0.609 |
| No. of sniffs of the object                | 5.25 ± 1.150 | 4.40 ± 1.220 | 0.136 |
| Latency before 1st sniff of the object (s) | 43.2 ± 7.47  | 40.9 ± 9.96  | 0.855 |

268 <sup>1</sup> GTN, kids born to dams exposed to thermal-neutral conditions during the first 45 days of  
 269 gestation (n = 16); GHS, kids born to dams exposed to heat stress conditions during the first  
 270 45 days of gestation (n = 10).

271

### 272 **Effects of heat stress on growing goats**

273 The results from behavior parameters at 8 months of age obtained during the heat exposure  
 274 trial are summarized in Table 4. No differences were observed between GTN and GHS  
 275 growing goats in any of the parameters ( $P > 0.10$ ) during the trial. Only lying-straight showed  
 276 a treatment per time interaction trend ( $P = 0.099$ ), however, no further differences were  
 277 encountered between GTN and GHS animals neither the basal nor the heat-stress period.

278 **Table 4. Behavioral and postural average expression (%) of growing goats over the basal**  
 279 **period and after the heat-challenge period.**

| Item | Treatment <sup>1</sup> |     | SED <sup>2</sup> | Effect ( $P$ -value) |                   |          |
|------|------------------------|-----|------------------|----------------------|-------------------|----------|
|      | GTN                    | GHS |                  | Trt <sup>3</sup>     | Week <sup>4</sup> | Trt×week |

| <b>Feeding behavior (%)</b>              |      |      |       |       |       |       |
|------------------------------------------|------|------|-------|-------|-------|-------|
| Feeding                                  | 24.0 | 25.2 | 2.14  | 0.702 | 0.001 | 0.533 |
| Rumination                               | 14.1 | 16.9 | 1.50  | 0.179 | 0.001 | 0.345 |
| Drinking                                 | 2.02 | 1.58 | 0.404 | 0.042 | 0.001 | 0.857 |
| <b>Non-feeding behaviors (%)</b>         |      |      |       |       |       |       |
| Exploration                              | 4.46 | 4.88 | 0.814 | 0.709 | 0.001 | 0.231 |
| Grooming                                 | 3.81 | 3.77 | 0.515 | 0.957 | 0.001 | 0.613 |
| Other                                    | 3.07 | 2.77 | 0.443 | 0.645 | 0.003 | 0.390 |
| Resting                                  | 41.2 | 37.9 | 2.35  | 0.312 | 0.001 | 0.361 |
| <b>Thermally-associated behavior (%)</b> |      |      |       |       |       |       |
| Open-mouth panting                       | 0.99 | 1.18 | 0.627 | 0.786 | 0.001 | 0.989 |
| Close-mouth panting                      | 41.6 | 37.0 | 3.90  | 0.448 | 0.001 | 0.502 |
| <b>Postures (%)</b>                      |      |      |       |       |       |       |
| Standing-walking                         | 1.38 | 1.55 | 1.547 | 0.644 | 0.001 | 0.985 |
| Standing-immobile                        | 33.6 | 35.3 | 2.64  | 0.643 | 0.001 | 0.718 |
| Lying-joint                              | 54.5 | 50.9 | 3.82  | 0.505 | 0.001 | 0.703 |
| Lying-straight                           | 4.95 | 5.48 | 2.172 | 0.859 | 0.001 | 0.099 |
| Neck extended                            | 0.42 | 0.23 | 0.233 | 0.736 | 0.006 | 0.249 |

280 <sup>1</sup> GTN, kids born to dams exposed to thermal-neutral conditions during the first 45 days of  
 281 gestation (n = 8); GHS, kids born to dams exposed to heat stress conditions during the first 45  
 282 days of gestation (n = 8).

283 <sup>2</sup> Standard error of the difference.

284 <sup>3</sup> Trt, treatment effect (GHS vs GTN).

285 <sup>4</sup> Basal period corresponded to the first week at thermal-neutral conditions and heat-stress  
 286 (HS) period corresponded to the following three weeks.

287

288 All parameters were affected after the heat-stress challenge regardless of the treatment  
289 (GTN vs. GHS) as shown in Fig 1. Feeding, exploration and grooming behaviors were  
290 reduced immediately after the heat challenge (week 2) and remained low compared to the  
291 basal period ( $P < 0.001$ ) in both, GTN and GHS goats. Rumination was also lower after the  
292 heat challenge, but it started to recover towards the end of the experiment although never  
293 reached basal thermal-neutral values (week 4;  $P < 0.001$ ). Drinking behavior also increased  
294 dramatically during the first week of exposure to heat ( $P < 0.001$ ), but returned to initial  
295 values at the end of the experiment. Resting also increased progressively throughout the  
296 exposure to heat stress although did not reach basal values by the end of the experiment.

297

298 **Fig 1. Activity behavior average expression (%) of growing goats over the basal thermal-**  
299 **neutral period (week 1) and during the heat-challenge period for 3 weeks (weeks 2 to 4).**

300 Bars indicate standard error.

301

302 Postural behaviors averages are presented in Fig 2. Animals were lying more  
303 frequently during the heat challenge ( $P < 0.01$ ), predominantly with legs joint, detrimental to  
304 standing that was less observed over the heat challenge ( $P < 0.01$ ).

305

306 **Fig 2. Posture average expression (%) of growing goats over the basal thermal-neutral**  
307 **period (week 1) and during the heat-challenge period for 3 weeks (weeks 2 to 4).** Bars

308 indicate standard error.

309

310 Additionally, as presented in Fig 3, the neck was extended more frequently compared  
311 to the basal week during the heat challenge ( $P = 0.018$ ), as well as animals started to

312 experience close-mouth panting after being exposed to heat and reduced this behavior  
313 progressively towards the end of the trial. Additionally, open-mouth panting was highest at  
314 week 1 of HS and disappeared at week 3.

315

316 **Fig 3. Thermally-associated behavior average expression (%) of growing goats over the**  
317 **basal thermal-neutral period (week 1) and during the heat-challenge period for 3 weeks**  
318 **(weeks 2 to 4). Bars indicate standard error.**

319

## 320 **Discussion**

321 In the presented study the effect of prenatal stress by exposing dairy goats to heat during  
322 mating and early pregnancy was evaluated. We aimed to investigate whether gestational  
323 exposure to heat had an impact on the development of the offspring lately in growing stages.  
324 The heat stress (HS) response was confirmed, by the evaluation of physiological parameters  
325 as well as feed intake. In this sense, GHS goats showed higher rectal temperature (+0.68°C)  
326 and respiration rate (+76 breaths/min) and a reduction by 15% in feed intake compared to  
327 GTN ones. These findings agree with previous results obtained by other authors in goats  
328 exposed to similar HS conditions [21-23]. As physiology parameters are the most reliable  
329 signs to evaluate the severity of heat stress in goats [24], goats in the present study showed  
330 clear signs of stress as a response to the heat challenge.

331 Although in the present study goats were mated under heat exposure, all could be  
332 effectively fertilized. Moreover, the initial hypothesis claimed that heat stress during early  
333 gestation might further affect gestation and the development of the offspring postnatally. In  
334 this regard, the most relevant outcomes were the shortening of the gestation duration of GHS  
335 goats by 3 days and the reduction of birth weight of GHS kids compared to GTN kids.  
336 Although in our study the association between the gestation length and the birth weight could



337 not be confirmed, there is sufficient body of research that has confirmed this link in the past in  
338 sheep [25] and in cows [13,26]. These authors suggested that less time of gestation could lead  
339 to a reduction in the contributions of nutrients from the mother to the fetus. Actually, in the  
340 last 2 months of the pregnancy period is when the greatest growth of the fetus has been  
341 described in cattle (60% of the weight at birth) [27] what could partially explain the lower  
342 birth weight in GHS kids. In fact, both the shortening of the pregnancy and thus, the derived  
343 prematurity of the animals, and the thermal effect could be cofounded. Nonetheless, it is  
344 worth to mention that these associations might occur at least after the exposure to heat during  
345 the late gestation and in our case, BW differences were negligible at 35 days of life between  
346 GHS and GTN kids, which suggests that kid goats compensated the loss of fetal body growth  
347 after birth.

348         Nevertheless, other authors [28], were not able to demonstrate differences in the  
349 duration of pregnancy in cows exposed to heat stress at the end of pregnancy, but still the  
350 birth weight of calves born from heat stressed cows was lower in relation to its counterpart,  
351 suggesting that the reduction in the duration of pregnancy itself is not solely responsible for  
352 the reduction of birth weight, but there may be other biological changes occurring during heat  
353 stress response that affect birth weight. Heat stress during pregnancy is actually associated  
354 with poor placental development and lower blood flow, which may result in less nutrient flow  
355 to the fetus [27,29]. Additionally, Zhu et al. [16] reported that nutrient restriction of beef cows  
356 during the first third of gestation period resulted in reduced placental development and fetal  
357 weights. Hence, a reduction of nutrient supply during the first third of gestation (less feed  
358 intake by GHS) could result in impaired placental function, which negatively affects growth  
359 during gestation and contributes to lower birth weight.

360         In the present study we also compared the behavioral reaction to novel environments  
361 of female kids (around 1 month of life) prenatally exposed to heat stress during the mating

362 and first 45 days of gestation. In a first approach, we implemented two tests, arena test (AT)  
363 and novel object test (NOT), in order to assess the behavioral reactivity of the kids to a new  
364 environment and an unfamiliar object, respectively. The results showed mild changes in the  
365 behavioral response of kids previously exposed to heat stress *in utero*. During the AT, GHS  
366 kids showed a reduction in the number of sniffing events in the arena. When kid goats were  
367 exposed to novel object test (NOT), a reduction in exploratory behavior (i.e. sniffing events)  
368 was also confirmed but these differences disappeared when kid goats were exposed again to  
369 NOT at 3 month of life. These results contrast with those from Roussel et al. [30], who found  
370 that kids, coming from goats under transport stress, explored (i.e. sniffing) the new  
371 environment more often than control kids. Some behavioral indicators such as  
372 immobilization, a reduction in explorative behavior and reactivity towards humans, have been  
373 related to fear [31-33]. At hormonal level, these changes have been associated to changes in  
374 the hypothalamic-pituitary-adrenal (HPA) axis [4] causing an elevation of cortisol in the  
375 maternal circulating blood during the fetal development [30,34]. Although we did not carry  
376 out measurements of cortisol in goats nor kids to confirm this casuistic, it is worth to mention  
377 that most of the development of the neural system takes place during the latter phases of  
378 gestation, and in our study, goats were not exposed to heat stress during late gestation. Thus,  
379 this could be a reason why the differences found in our animals were not as consistent as  
380 previous reports.

381 In the long-term scenario, the effects of prenatal heat stress on kids were followed up  
382 to growing age around five months of life, whereby the behavior was assessed by scan-  
383 sampling before and after heat exposure in order to elucidate whether prenatal heat stress had  
384 any effect on the adaptive capacity. Resting and drinking increased dramatically during the  
385 first week of heat exposure. Lying and drinking are considered as ideal biological markers for  
386 assessing the severity of the heat stress response [24]. Similarly, exploratory, grooming, and

387 feeding behaviors declined throughout the entire period of heat exposure. Also, rumination, an  
388 essential component of the ruminant behavior that is also used as an indicator of stress and  
389 anxiety [35,36], was reduced. These activities were also accompanied by changes on the  
390 posture of animals, spending more time lying during heat exposure, mainly with legs drawing  
391 into the body, and consequently less time standing. Lying and inactivity are common  
392 expressions observed after high temperature exposition as a strategy to dissipate heat and  
393 spare energy in addition to reduce feeding [37,38]. Thus, according to our results, grown kid  
394 goats triggered a stress response when first exposed to heat. However, the fact that lying and  
395 drinking were gradually decreased afterwards suggests that animals progressively adapted to  
396 the rise of temperature.

397 In the same line of the results obtained in the arena tests that disappeared with time,  
398 most of the behavioral parameters assessed did not differ between GTN or GHS goats neither  
399 before nor after the heat challenge (no significant interaction between treatment and week).  
400 Only a tendency was observed for lying with straight legs ( $P = 0.099$ ). Akbarinejad et al. [39]  
401 could not demonstrate changes in the adaptation capacity after submission to heat stress at  
402 first, second and last third of gestation of cows. In this sense, most of the works cited  
403 evaluated heat stress during late gestation, observing most of the alterations. Thence, although  
404 it seemed that the offspring could have been affected at birth, later results would suggest that  
405 HS during early gestation would not affect the offspring per se out of the gestational  
406 capability of dams. Because dams were effectively stressed according to physiological  
407 measurements, heat stress during the early period of the embryo development (1 to 45 days  
408 after mating) may not induce effects on the adaptive capacity of the offspring.

409

## 410 **Conclusions**

411 Heat stress during the period of mating until the first 45 days of gestation in dairy  
412 goats reduced the duration of pregnancy and the birth weight of kids. The behavioral response  
413 of kid goats to a novel environment and objects was altered by in utero heat stress. The  
414 exposure of the fetus to the stress response of the mother (i.e., heat stress) can modify its  
415 ability to respond to other types of stress (e.g., environmental stress) in the early postnatal  
416 life. Nonetheless, in the conditions of this study (heat duration and intensity and gestation  
417 stage) such impact disappeared towards the adult life of the animals with no differences in  
418 adaptability to heat stress.

419

## 420 **Supporting information**

421 **S1 Fig. Picture of the experimental facilities.** (A) Capture of the recording for the arena test  
422 (AT). (B) Capture of the recording for the novel object test (NOT).

423 **S1 Table. List of behavioral and postural parameters recorded by scan-sampling during**  
424 **the heat-challenge experiment in the growing goats.** These parameters are drawn from the  
425 Welfare Assessment Protocol for Goats [18].

426

## 427 **Acknowledgements**

428 The authors are also grateful to the team of SGCE (Servei de Granges i Camps  
429 Experimentals) of the UAB for the care of the animals.

430

## 431 **Author Contributions**

432 **Conceptualization:** Ahmed A. K. Salama, Gerardo Caja, Xavier Such.

433 **Data curation:** Wellington Coloma, Nabil Mehaba.

434 **Formal analysis:** Wellington Coloma, Pol Llonch.

435 **Funding acquisition:** Ahmed A. K. Salama, Gerardo Caja.  
436 **Investigation:** Wellington Coloma, Nabil Mehaba, Xavier Such, Gerardo Caja, Ahmed A. K.  
437 Salama.  
438 **Methodology:** Wellington Coloma, Ahmed A. K. Salama, Xavier Such.  
439 **Project administration:** Ahmed A. K. Salama.  
440 **Supervision:** Ahmed A. K. Salama, Xavier Such.  
441 **Visualization:** Wellington Coloma.  
442 **Writing – original draft preparation:** Wellington Coloma.  
443 **Writing – review & editing:** Pol Llonch, Ahmed A. K. Salama.

444

#### 445 **References**

- 446 1. Viltart O, Vanbesien-Mailliot CC. Impact of prenatal stress on neuroendocrine  
447 programming. *Sci World J.* 2007;7:1493–537.
- 448 2. Schroeder M, Sultany T, Weller A. Prenatal stress effects on emotion regulation differ  
449 by genotype and sex in prepubertal rats. *Dev Psychobiol.* 2009;55. doi:  
450 10.1002/dev.21010.
- 451 3. Seckl JR. Glucocorticoid programming of the fetus; adult phenotypes and molecular  
452 mechanisms. *Mol Cell Endocrinol.* 2001;185: 61–71.
- 453 4. Schneider ML, Moore CF, Kraemer GW, Roberts AD, DeJesus OT. The impact of  
454 prenatal stress, fetal alcohol exposure, or both on development: perspectives from a  
455 primate model. *Psychoneuroendocrinology.* 2002;27: 85–98.
- 456 5. Weinstock M. Alterations induced by gestational stress in brain morphology and  
457 behaviour of the offspring. *Prog Neurobiol.* 2001;65: 27–51.
- 458 6. McGowan PO, Matthews SG. Prenatal stress, glucocorticoids, and developmental  
459 programming of the stress response. *Endocrinology.* 2018;159: 69–82.

- 460 7. Marchlewska-Koj A, Kapusta J, Kruczek M. Prenatal stress modifies behavior in  
461 offspring of bank voles (*Clethrionomys glareolus*). *Physiol Behav.* 2003;79: 671–8.
- 462 8. Estanislau C, Morato S. Prenatal stress produces more behavioral alterations than  
463 maternal separation in the elevated plus-maze and in the elevated T-maze. *Behav*  
464 *Brain Res.* 2005;163: 70–7.
- 465 9. Van den Hove DLA, Leibold NK, Strackx E, Martinez-Claros M, Lesch KP,  
466 Steinbusch HWM, et al. Prenatal stress and subsequent exposure to chronic mild stress  
467 in rats; interdependent effects on emotional behavior and the serotonergic system. *Eur*  
468 *Neuropsychopharmacol.* 2014;24: 595–607.
- 469 10. Vallée M, Mayo W, Dellu F, Le Moal M, Simon H, Maccari S. Prenatal stress induces  
470 high anxiety and postnatal handling induces low anxiety in adult offspring: correlation  
471 with stress-induced corticosterone secretion. *J Neurosci.* 1997;17: 2626–36.
- 472 11. Salama AAK, Caja G, Hamzaoui S, Badaoui B, Castro-costa A, Guilhermino MM, et  
473 al. Different levels of response to heat stress in dairy goats. *Small Rumin Res.*  
474 2014;121: 73–9.
- 475 12. Dahl GE, Tao S, Laporta J. Triennial lactation symposium/bolfa: Late gestation heat  
476 stress of dairy cattle programs dam and daughter milk production. *J Anim Sci.*  
477 2017;95: 5701–10.
- 478 13. Laporta J, Fabris TF, Skibieli AL, Powell JL, Hayen MJ, Horvath K, et al. *In utero*  
479 exposure to heat stress during late gestation has prolonged effects on the activity  
480 patterns and growth of dairy calves. *J Dairy Sci.* 2017;100: 2976–84.
- 481 14. Fabris TF, Laporta J, Skibieli AL, Corra FN, Senn BD, Wohlgemuth SE, Dahl GE.  
482 Effect of heat stress during early, late, and entire dry period on dairy cattle. *J Dairy*  
483 *Sci.* 2019;102: 5647–56.

- 484 15. McGeady, T. A., P. J. Quinn, E. S. FitzPatrick, and M. T. Ryan. Veterinary  
485 Embryology. 1st ed. Oxford: Blackwell Publishing Ltd.; 2006.
- 486 16. Zhu MJ, Du M, Hess BW, Means WJ, Nathanielsz PW, Ford SP. Maternal nutrient  
487 restriction upregulates growth signaling pathway in the cotyledonary artery of cow  
488 placentomes. *Placenta*. 2007;28: 361–638.
- 489 17. Yang CH, Ko HL, Salazar LC, Llonch L, Manteca X, Camerlink I, et al. Pre-weaning  
490 environmental enrichment increases piglets' object play behaviour on a large scale  
491 commercial pig farm. *Appl Anim Behav Sci*. 2018;202: 7–12.
- 492 18. NRC. A guide to environmental research on animals. Washington: National Academy  
493 of Sciences; 1971.
- 494 19. Martin P, Bateson P. Recording methods. In: Martin P, Bateson P, editors. *Measuring  
495 Behaviour*. 3rd ed. Cambridge: Cambridge University Press; 2007. pp. 48–61.
- 496 20. Battini M, Barbieri S, Fioni L, Mattiello S. Feasibility and validity of animal-based  
497 indicators for on-farm welfare assessment of thermal stress in dairy goats. *Int J  
498 Biometeorol*. 2015;60: 289–96.
- 499 21. Maloiy GMO, Kanui TI, Towett PK, Wambugu SN, Miaron JO, Wanyoike MM.  
500 Effects of dehydration and heat stress on food intake and dry matter digestibility in  
501 East African ruminants. *Comp Biochem Physiol - A Mol Integr Physiol*. 2008;151:  
502 185–90.
- 503 22. Hamzaoui S, Salama AAK, Albanell E, Such X, Caja G. Physiological responses and  
504 lactational performances of late-lactation dairy goats under heat stress conditions. *J  
505 Dairy Sci*. 2013; 96:6355–65.
- 506 23. Castro-Costa A, Salama AAK, Moll X, Aguiló J, Caja G. Using wireless rumen  
507 sensors for evaluating the effects of diet and ambient temperature in nonlactating dairy  
508 goats. *J Dairy Sci*. 2015;98: 4646–58.

- 509 24. Shilja S, Sejian V, Bagath M, Mech A, David CG, Kurien EK, et al. Adaptive  
510 capability as indicated by behavioral and physiological responses, plasma HSP70  
511 level, and PBMC HSP70 mRNA expression in Osmanabadi goats subjected to  
512 combined (heat and nutritional) stressors. *Int J Biometeorol.* 2016;60: 1311–23.
- 513 25. Forbes JM. Factors affecting the gestation length in sheep. *J Agric Sci.* 1967 Apr  
514 27;68: 191-194.
- 515 26. Monteiro APA, Guo JR, Weng XS, Ahmed BM, Hayen MJ, Dahl GE, et al. Effect of  
516 maternal heat stress during the dry period on growth and metabolism of calves. *J*  
517 *Dairy Sci.* 2016;99: 3896–907.
- 518 27. Tao S, Dahl GE. Invited review: Heat stress effects during late gestation on dry cows  
519 and their calves. *J Dairy Sci.* 2013;96(7): 4079–93.
- 520 28. Tao S, Monteiro APA, Hayen MJ, Dahl GE. Short communication: Maternal heat  
521 stress during the dry period alters postnatal whole-body insulin response of calves. *J*  
522 *Dairy Sci.* 2014;97: 897–901.
- 523 29. Yates DT, Green AS, Limesand SW. Catecholamines mediate multiple fetal  
524 adaptations during placental insufficiency that contribute to intrauterine growth  
525 restriction : lessons from hyperthermic sheep. *J Pregnancy.* 2011;2011: 740408.
- 526 30. Roussel S, Boissy A, Montigny D, Hemsworth PH, Duvoux-Ponter C. Gender-specific  
527 effects of prenatal stress on emotional reactivity and stress physiology of goat kids.  
528 *Horm Behav.* 2005;47: 256–66.
- 529 31. Romeyer A, Bouissou MF. Assessment of fear reactions in domestic sheep, and  
530 influence of breed and rearing conditions. *Appl Anim Behav Sci.* 1992;34: 93–119.
- 531 32. Ruiz-Miranda CR, Callard M. Effects of the presence of the mother on responses of  
532 domestic goat kids (*Capra hircus*) to novel inanimate objects and humans. *Appl Anim*  
533 *Behav Sci.* 1992;33: 277–85.



- 534 33. Coulon M, Lévy F, Ravel C, Nowak R, Boissy A. Mild effects of gestational stress  
535 and social reactivity on the onset of mother – young interactions and bonding in sheep.  
536 *Int J Biol Stress*. 2014;17: 460–70.
- 537 34. Coulon M, Nowak R, Andanson S, Petit B, Lévy F, Boissy A. Effects of prenatal  
538 stress and emotional reactivity of the mother on emotional and cognitive abilities in  
539 lambs. *Dev Psychobiol*. 2015;57: 626–36.
- 540 35. Herskin MS, Munksgaard L, Ladewig J. Effects of acute stressors on nociception,  
541 adrenocortical responses and behavior of dairy cows. *Physiol Rep*. 2004;83: 411–20.
- 542 36. Bristow DJ, Holmes DS. Cortisol levels and anxiety-related behaviors in cattle.  
543 *Physiol Behav*. 2007;90: 626–8.
- 544 37. Kaliber M, Koluman N, Silanikove N. Physiological and behavioral basis for the  
545 successful adaptation of goats to severe water restriction under hot environmental  
546 conditions. *Animal*. 2016;10: 82–8.
- 547 38. Kovács L, Kézér FL, Bakony M, Jurkovich V, Szenci O. Lying down frequency as a  
548 discomfort index in heat stressed Holstein bull calves. *Sci Rep*. 2018;8: 15065.
- 549 39. Akbarinejad V, Gharagozlou F, Vojgani M. Temporal effect of maternal heat stress  
550 during gestation on the fertility and anti-Müllerian hormone concentration of offspring  
551 in bovine. *Theriogenology*. 2017;99: 69–78.

552

### 553 **Data availability statement**

554 All relevant data are within the paper and its Supporting information files.

555

### 556 **Funding**

557 This work is part of a research project funded by the Spanish Ministry of Economy and  
558 Competitiveness (Programa I+D+i orientada a los retos de la sociedad; Project AGL2013-44061-

559 R), and supported by the pre-doctoral FI grant from the Agency for Management of  
560 University and Research grants (Catalonia, Spain) awarded to NM.

561

562 **Competing interests**

563 Authors declare no competing interests.

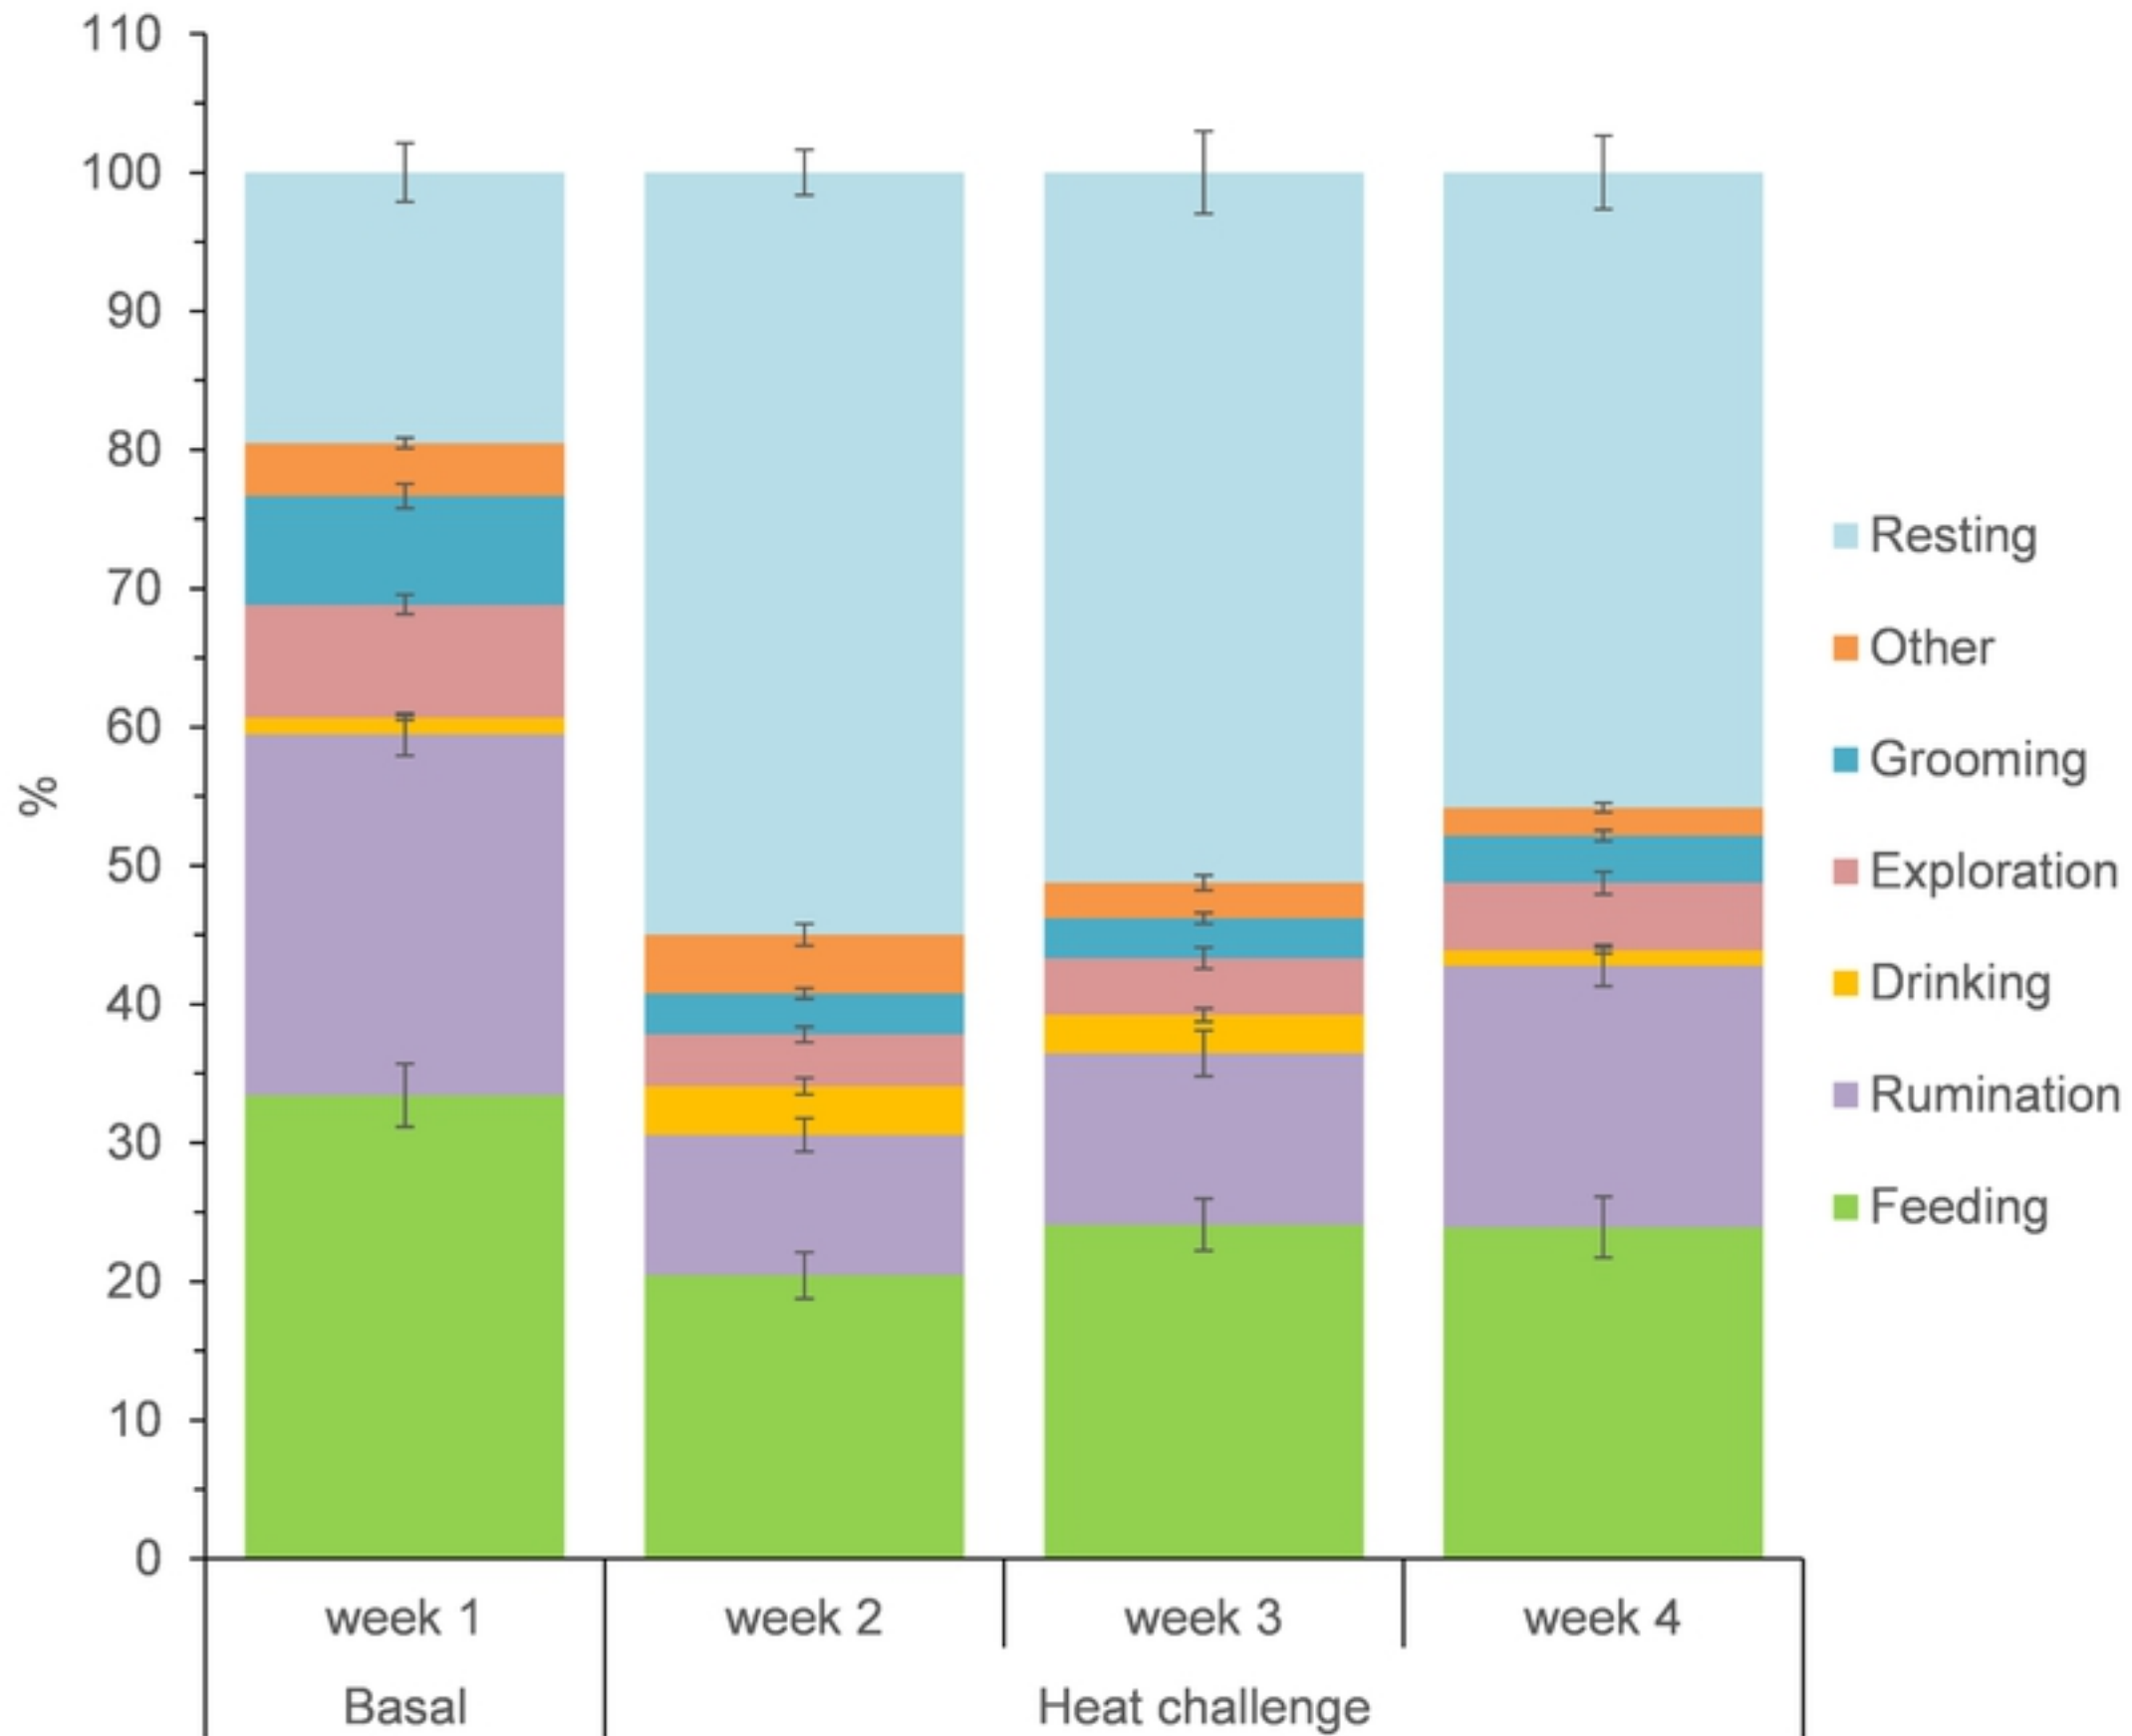

Figure 1

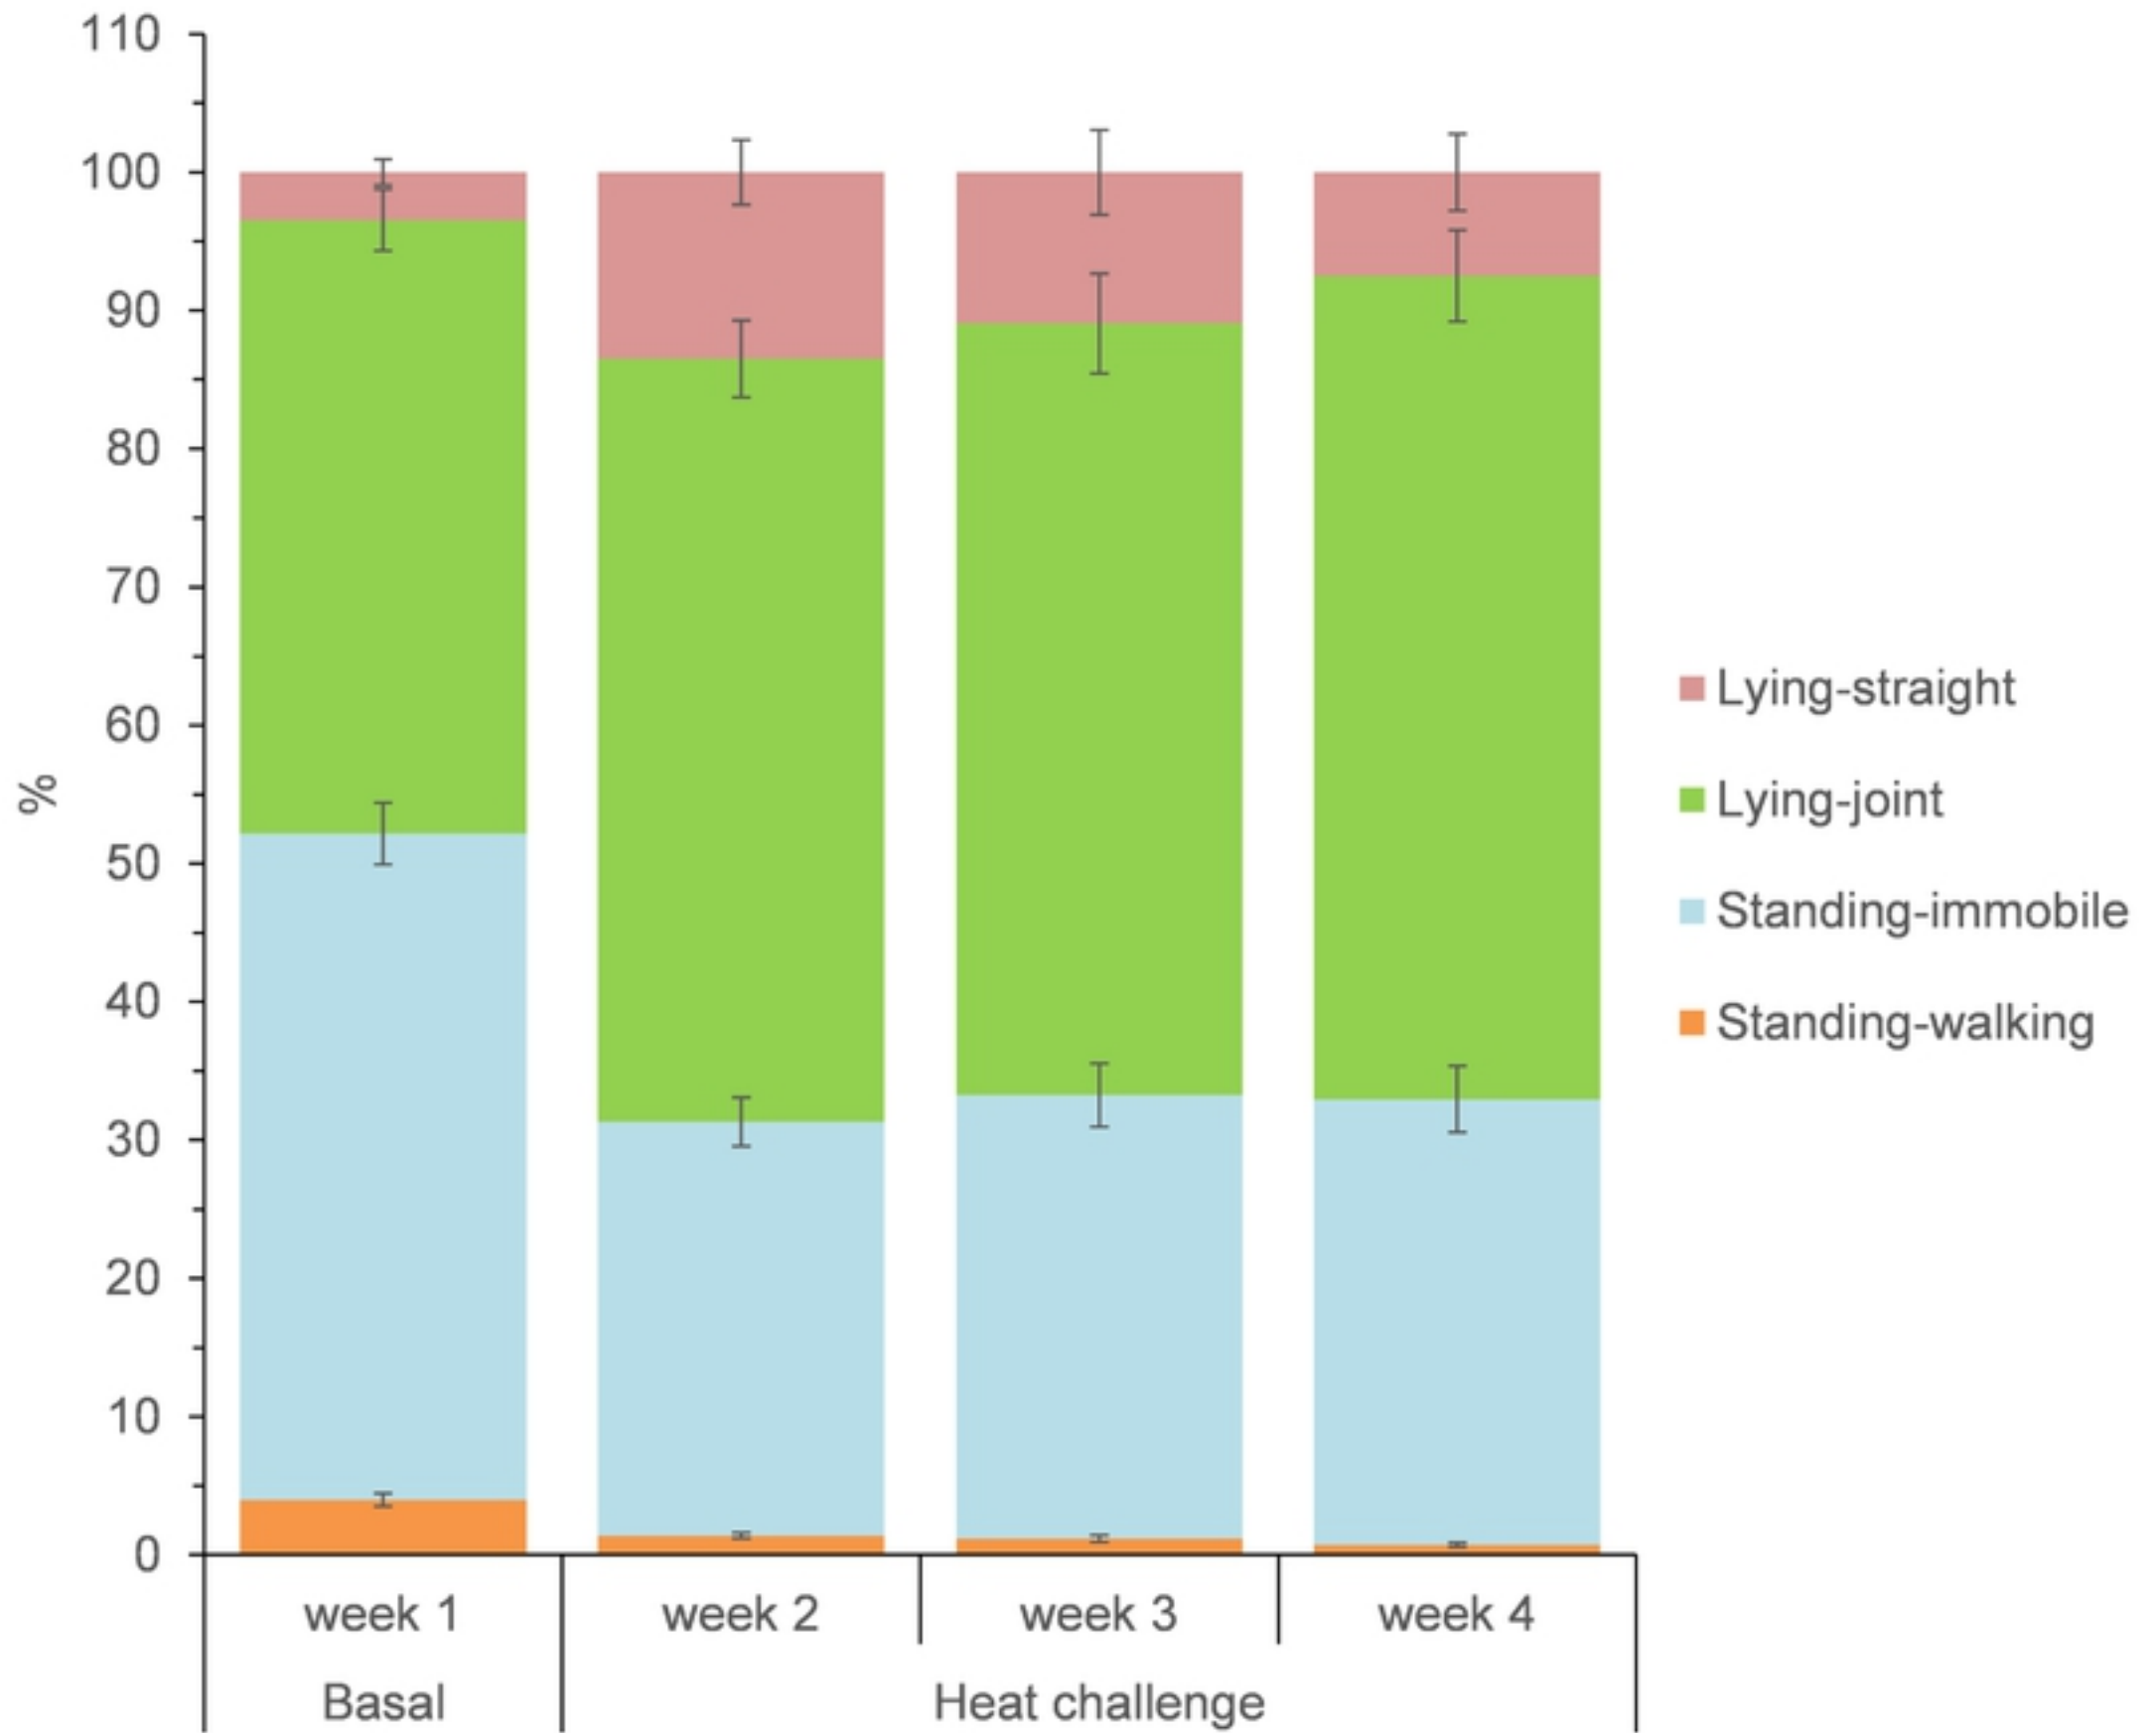

Figure 2

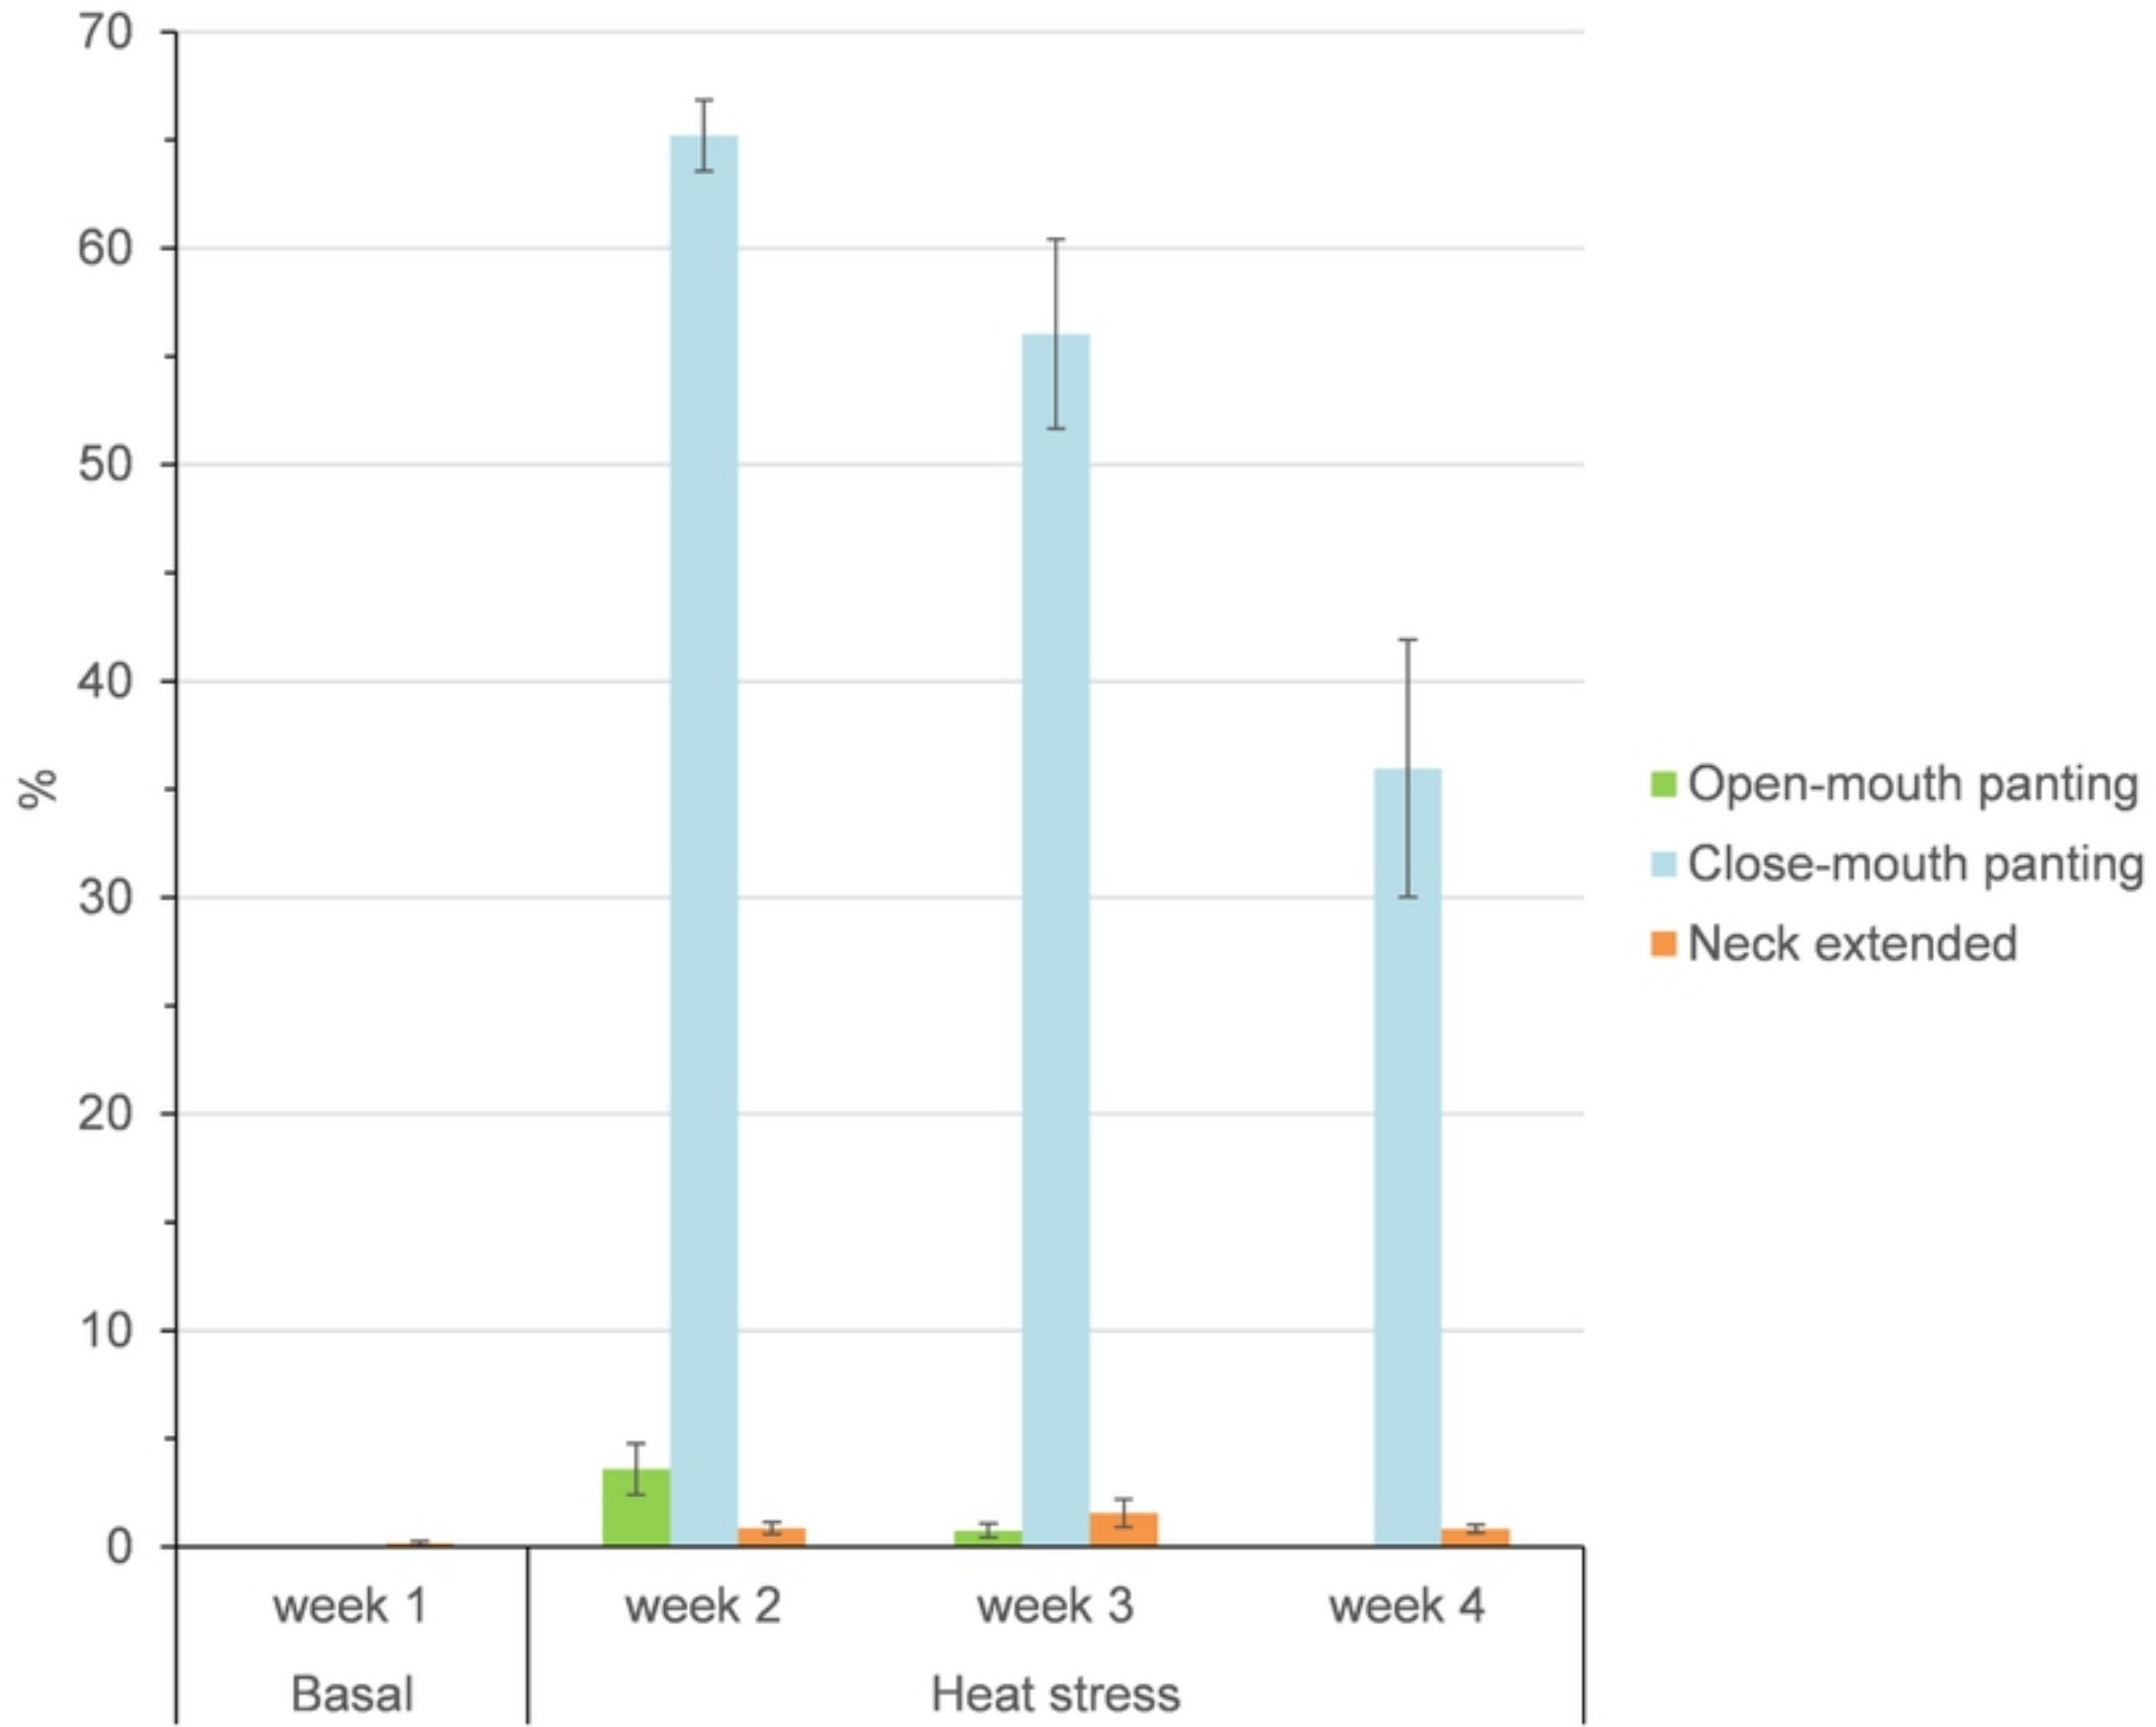

Figure 3
